# Supplementary material
Source: PubMed Central journal article supplement (PMC2767337)
Supplement: NIHMS148512-supplement-supplement_1.pdf [file NIHMS148512-supplement-supplement_1.pdf]

**Supplementary Table 1a. Patient Clinical History: East Asians**

| <b>Patient ID</b> | <b>Age</b> | <b>Sex</b> | <b>Smoker</b> | <b>Tumor type</b>              | <b>TNM</b> | <b>Stage</b> |
|-------------------|------------|------------|---------------|--------------------------------|------------|--------------|
| 14                | 80         | M          | Y             | Adenocarcinoma                 | T2N0M0     | IB           |
| 16                | 53         | F          | N             | Adenocarcinoma                 | T4N2M0     | IIIB         |
| 18                | 75         | F          | N             | Adenocarcinoma                 | T2N0M0     | IB           |
| 30                | 77         | F          |               | Adenocarcinoma                 | T2N1M0     | IIB          |
| 34                | 65         | M          | Y             | Squamous cell carcinoma        | T2N2M0     | IIIA         |
| 36                | 73         | M          | Y             | Squamous cell carcinoma        | T3N0M0     | IIB          |
| 37                | 62         | M          | Y             | Adenocarcinoma                 | T1N0M0     | IA           |
| 38                | 47         | F          | N             | Adenocarcinoma                 | T2N2M0     | IIIA         |
| 39                | 68         | M          | Y             | Squamous cell carcinoma        | T2N1M0     | IIB          |
| 40                | 67         | M          | Y             | Large cell carcinoma           | T2N2M0     | IIIA         |
| 41                | 74         | M          | Y             | Squamous cell carcinoma        | T2N2M0     | IIIA         |
| 43                | 56         | M          |               | Adenocarcinoma                 | T2N2M0     | IIIA         |
| 44                | 60         | M          | Y             | Adenocarcinoma                 | T2N2M1     | IV           |
| 45                | 56         | M          | Y             | Squamous cell carcinoma        | T2N2M0     | IIIA         |
| 51                | 66         | F          |               | Adenocarcinoma                 | T2N0M0     | IB           |
| 52                | 53         | M          |               | Adenocarcinoma                 | T2N2M0     | IIIA         |
| 54                | 47         | M          |               | Adenocarcinoma                 | T2N0M0     | IB           |
| 55                | 63         | M          | Y             | Squamous cell carcinoma        | T2N2M0     | IIIA         |
| 57                | 55         | F          |               | Adeno/Squamous                 | T3N0M0     | IIB          |
| 62                | 90         | M          |               | Adenocarcinoma                 | T2N1M1     | IV           |
| 63                | 79         | M          | Y             | Adenocarcinoma, mixed subtypes | T4N2M0     | IIIB         |
| 66                | 68         | M          |               | Adenocarcinoma                 | T2N2M0     | IIIA         |
| 67                | 80         | M          | Y             | Large cell carcinoma           | T2N0M0     | IB           |
| 68                | 68         | M          | Y             | Adenocarcinoma                 | T3N0M0     | IIB          |
| 69                | 44         | M          | Y             | Adenocarcinoma                 | T2N2M0     | IIIA         |
| 70                | 78         | M          |               | Small cell carcinoma           | T2N2M0     | IIIA         |
| 75                | 74         | M          | Y             | Adenocarcinoma                 | T2N0M0     | IB           |
| 76                | 75         | M          | Y             | Squamous cell carcinoma        | T1N0M0     | IA           |
| 79                | 73         | M          | Y             | Adenocarcinoma                 | T2N0M0     | IB           |

|     |    |   |   |                         |        |      |
|-----|----|---|---|-------------------------|--------|------|
| 80  | 69 | M | Y | Adenocarcinoma          | T2N2M0 | IIIA |
| 81  | 57 | F | N | Adenocarcinoma          | T4N2M0 | IIIB |
| 83  | 77 | M | Y | Large cell carcinoma    | T2N0M0 | IB   |
| 85  | 66 | M | Y | Adenocarcinoma          | T2N0M0 | IB   |
| 89  | 76 | M | Y | Adenocarcinoma          | T2N0M0 | IB   |
| 92  | 65 | M | Y | Squamous cell carcinoma | T3N2M0 | IIIA |
| 96  | 74 | M | Y | Adenocarcinoma          | T2N0M0 | IB   |
| 101 | 73 | F | Y | Squamous cell carcinoma | T2N3M0 | IIIB |
| 103 | 62 | M | Y | Squamous cell carcinoma | T3N2M0 | IIIA |
| 104 | 69 | M | Y | Adenocarcinoma          | T2N1M0 | IIB  |
| 113 | 79 | M | Y | Adenocarcinoma          | T4N2M0 | IIIB |
| 115 | 74 | M | Y | Squamous cell carcinoma | T2N0M0 | IB   |
| 118 | 77 | M | Y | Adenocarcinoma          | T2N0M0 | IB   |
| 119 | 56 | M | Y | Adenocarcinoma          | T2N0M0 | IB   |
| 121 | 70 | M |   | Adenocarcinoma          | T2N0M1 | IV   |
| 126 | 45 | M | Y | Adenocarcinoma          | T2N2M0 | IIIA |
| 127 | 67 | M | Y | Squamous cell carcinoma | T2N0M0 | IB   |
| 128 | 43 | M | Y | Large cell carcinoma    | T1N2M0 | IIIA |
| 132 | 72 | F |   | Adenocarcinoma          | T1N1M0 | IIA  |
| 134 | 71 | M | Y | Adenocarcinoma          | T2N2M0 | IIIA |
| 139 | 67 | M | Y | Squamous cell carcinoma | T4N0M0 | IIIB |
| 140 | 74 | M | Y | Adenocarcinoma          | T2N0M1 | IV   |
| 142 | 70 | F |   | Adenocarcinoma          | T3N2M0 | IIIA |
| 143 | 81 | M | Y | Squamous cell carcinoma | T2N0M0 | IB   |
| 144 | 62 | M | Y | Adenocarcinoma          | T2N1M0 | IIB  |
| 146 | 69 | F | N | Adenocarcinoma          | T2N0M0 | IB   |
| 147 | 80 | M |   | Squamous cell carcinoma | T2N0M0 | IB   |
| 148 | 78 | M |   | Adenocarcinoma          | T2N2M1 | IV   |
| 152 | 79 | M | Y | Adenocarcinoma          | T1N0M0 | IA   |
| 156 | 53 | M | Y | Adenocarcinoma          | T2N1M0 | IIB  |
| 157 | 84 | M | Y | Squamous cell carcinoma | T2N0M0 | IB   |
| 161 | 59 | F |   | Adenocarcinoma          | T2N0M0 | IB   |
| 162 | 71 | F |   | Adenocarcinoma          | T2N0M1 | IV   |
| 163 | 55 | M | Y | Large cell carcinoma    | T3N0M0 | IIB  |
| 164 | 73 | M |   | Adenocarcinoma          | T2N0M0 | IB   |

|     |    |   |   |                               |        |      |
|-----|----|---|---|-------------------------------|--------|------|
| 165 | 69 | M |   | Adenocarcinoma                | T2N0M1 | IV   |
| 168 | 65 | F |   | Adenocarcinoma                | T4N0M0 | IIIB |
| 169 | 48 | M | Y | Adenocarcinoma                | T2N2M0 | IIIA |
| 171 | 64 | M | Y | Squamous cell carcinoma       | T2N1M0 | IIB  |
| 173 | 61 | M | Y | Squamous cell carcinoma       | T2N0M0 | IB   |
| 176 | 50 | M | Y | Adenocarcinoma                | T2N2M1 | IV   |
| 179 | 79 | M | Y | Adenocarcinoma                | T4N0M0 | IIIB |
| 204 | 57 | F |   | Adenocarcinoma                | T2N0M0 | IB   |
| 206 | 71 | M | Y | Adenocarcinoma                | T1N0M0 | IA   |
| 207 | 73 | F |   | Squamous cell carcinoma       | T2N0M0 | IB   |
| 208 | 72 | M | N | Adenocarcinoma                | T2N0M0 | IB   |
| 209 | 64 | F | N | Adenocarcinoma                | T1N0M0 | IA   |
| 210 | 50 | M | Y | Squamous cell carcinoma       | T2N0M0 | IB   |
| 211 | 54 | F |   | Adenocarcinoma                | T2M0N0 | IB   |
| 212 | 52 | F | N | Adenocarcinoma                | T2N1M0 | IIB  |
| 215 | 68 | F | Y | Adenocarcinoma                | T2N0M0 | IB   |
| 217 | 66 | M | Y | Adeno/Squamous                | T2N1M0 | IIB  |
| 219 | 69 | M | Y | Squamous cell carcinoma       | T2N0M0 | IB   |
| 220 | 53 | M | Y | Adenocarcinoma                | T2N2M0 | IIIA |
| 221 | 79 | M | Y | Adenocarcinoma                | T2N0M0 | IB   |
| 223 | 50 | M | Y | Adenocarcinoma                | T2N0M0 | IB   |
| 224 | 54 | F |   | Adenocarcinoma                | T1N0M0 | IA   |
| 225 | 73 | M | Y | Squamous cell carcinoma       | T3N0M0 | IIB  |
| 226 | 74 | M | Y | Adenocarcinoma                | T2N0M0 | IB   |
| 227 | 74 | M | N | Adenocarcinoma                | T2N*M0 | IB   |
| 229 | 83 | M | Y | Adenocarcinoma                | T2N0M0 | IB   |
| 231 | 55 | M | N | Adenocarcinoma                | T2N2M0 | IIIA |
| 232 | 59 | M | Y | Adenocarcinoma                | T2N2M0 | IIIA |
| 233 | 75 | M | Y | non-small cell carcinoma      | T2N0M0 | IB   |
| 235 | 58 | F | N | Adenocarcinoma, mixed subtype | T2N2M0 | IIIA |
| 242 | 73 | M | N | Adenocarcinoma                | T2N2M0 | IIIA |
| 248 | 78 | M | Y | Adenocarcinoma                | T1N2M0 | IIIA |
| 249 | 83 | M | Y | Adenocarcinoma                | T1N1M0 | IIA  |
| 250 | 64 | F |   | Squamous cell carcinoma       | T2N2M0 | IIIA |
| 256 | 73 | M |   | Adenocarcinoma                | T2N2M0 | IIIA |

|     |    |   |   |                                |        |      |
|-----|----|---|---|--------------------------------|--------|------|
| 258 | 40 | F | N | Adenocarcinoma                 | T3N0M0 | IIB  |
| 260 | 75 | M |   | Adenocarcinoma, mixed subtypes | T4N2M0 | IIIB |
| 264 | 76 | F | N | Adenocarcinoma                 | T2N2M0 | IIIA |
| 271 | 67 | M | Y | Squamous cell carcinoma        | T2N2M0 | IIIA |
| 272 | 63 | M | Y | Squamous cell carcinoma        | T2N2M0 | IIIA |
| 274 | 62 | M |   | Large cell carcinoma           | T2N1M0 | IIB  |
| 282 | 73 | M | Y | Squamous cell carcinoma        | T2N0M0 | IB   |
| 290 | 50 | F |   | Adenocarcinoma, multifocal     | T4N0M0 | IIIB |
| 291 | 49 | M |   | Adenocarcinoma                 | T2N0M0 | IB   |
| 293 | 73 | M | N | Pleomorphic carcinoma          | T2N0M0 | IB   |
| 294 | 58 | M | N | Adenocarcinoma                 | T4N2M1 | IV   |
| 295 | 70 | M |   | Adenocarcinoma                 | T1N0M0 | IA   |
| 297 | 78 | M | Y | Adenocarcinoma                 | T2N0M0 | IB   |
| 299 | 78 | M | Y | Squamous cell carcinoma        | T2N2M0 | IIIA |
| 300 | 71 | M | Y | Squamous cell carcinoma        | T2N0M0 | IB   |
| 302 | 79 | M | Y | Adenocarcinoma                 | T2N2M0 | IIIA |
| 305 | 77 | F |   | Adenocarcinoma                 | T1N0M0 | IA   |
| 306 | 75 | M | Y | Large cell carcinoma           | T2N0M0 | IB   |
| 309 | 80 | M | Y | Squamous cell carcinoma        | T2N2M0 | IIIA |
| 311 | 71 | F | N | Mucoepidermoid carcinoma       | T2N2M0 | IIIA |
| 312 | 69 | M | N | Adenocarcinoma                 | T2N0M0 | IB   |
| 314 | 67 | M | Y | Squamous cell carcinoma        | T2N0M0 | IB   |
| 317 | 76 | F |   | Adenocarcinoma                 | T1N1M0 | IIA  |
| 324 | 75 | M | Y | Squamous cell carcinoma        | T3N0M0 | IIB  |
| 329 | 77 | M | Y | Squamous cell carcinoma        | T2N0M1 | IV   |
| 330 | 78 | M | Y | Adenocarcinoma                 | T2N0M0 | IB   |
| 335 | 79 | M | Y | Squamous cell carcinoma        | T1N2M0 | IIIA |
| 336 | 73 | M | Y | Squamous cell carcinoma        | T1N0M0 | IA   |
| 341 | 43 | F |   | Adenocarcinoma                 | T2N0M0 | IB   |
| 345 | 75 | M | Y | Adenocarcinoma                 | T2N0M0 | IB   |
| 349 | 50 | M | Y | Adenocarcinoma                 | T1N2M0 | IIIA |
| 360 | 78 | F |   | Adenocarcinoma                 | T4N0M0 | IIIB |
| 370 | 42 | F |   | Mucoepidermoid carcinoma       | T4N*M0 | IIIB |
| 372 | 81 | M | Y | Squamous cell carcinoma        | T2N1M0 | IIB  |
| 375 | 75 | M |   | Adenocarcinoma                 | T2N0M0 | IB   |

|     |    |   |   |                         |        |      |
|-----|----|---|---|-------------------------|--------|------|
| 378 | 79 | M | Y | Adenocarcinoma          | T2N0M0 | IB   |
| 382 | 71 | F | N | Adenocarcinoma          | T2N0M0 | IIB  |
| 383 | 63 | F | N | Adenocarcinoma          | T2N0M0 | IB   |
| 385 | 75 | M | Y | Squamous cell carcinoma | T2N0M0 | IIA  |
| 386 | 81 | M | Y | Adenocarcinoma          | T4N0M0 | IIIB |
| 389 | 76 | M | Y | Squamous cell carcinoma | T2N0M0 | IB   |
| 390 | 80 | M | Y | Squamous cell carcinoma | T2N0M0 | IIIB |
| 391 | 71 | M | N | Adenocarcinoma          | T2N0M0 | IB   |
| 392 | 44 | F | N | Adenocarcinoma          | T2N1M0 | IIB  |
| 404 | 61 | F | N | Adenocarcinoma          | T2N0M0 | IA   |

Open boxes: information not available

**Supplementary Table 1b. Patient Clinical History: Caucasians**

| <b>Patient ID</b> | <b>Age</b> | <b>Sex</b> | <b>Smoker</b> | <b>Tumor Type</b>                    | <b>Stage</b> |
|-------------------|------------|------------|---------------|--------------------------------------|--------------|
| US 1              | 67         | M          | Y             | Adenocarcinoma                       |              |
| US 2              | 70         | M          | Y             | Adenocarcinoma                       | IV           |
| US 4              | 72         | M          | Y             | Adenocarcinoma                       | IIIA         |
| US 5              | 72         | F          | Y             | Adenocarcinoma(Acinar cell)          | IB           |
| US 6              | 63         | M          | Y             | Adenocarcinoma                       | IA           |
| US 8              | 67         | M          | Y             | Adenocarcinoma                       | IIIA         |
| US 13             | 51         | M          | Y             | Adenocarcinoma                       | IIIB         |
| US 14             | 91         | M          | Y             | Adeno with large cell neuroendocrine | IA           |
| US 15             | 60         | M          | Y             | Adenocarcinoma                       | IA           |
| US 16             | 53         | M          | Y             | Adenocarcinoma                       | IIB          |
| US 18             | 70         | M          | Y             | Adenocarcinoma                       | IIIA         |
| US 20             | 79         | F          | Y             | Adenocarcinoma                       | IB           |
| US 21             | 77         | M          | Y             | Adenocarcinoma                       | IA           |
| US 22             | 74         | M          | Y             | Adenocarcinoma                       | IB           |
| US 24             | 70         | M          | Y             | Adenocarcinoma                       | IB           |
| US 25             | 66         | F          | Y             | Adenocarcinoma                       | IB           |
| US 26             | 55         | F          | Y             | Adenocarcinoma                       | IB           |
| US 27             | 37         | M          | N             | Adenocarcinoma                       | IB           |
| US 28             | 66         | F          | N             | Adenocarcinoma                       | IA           |
| US 30             | 69         | M          | Y             | Adenocarcinoma                       | IA           |
| US 31             | 62         | M          | Y             | Adenocarcinoma                       | IIIA         |
| US 35             | 63         | M          | Y             | Adenocarcinoma                       | IA           |
| US 36             | 49         | M          | Y             | Adenocarcinoma                       | IA           |

|        |    |   |   |                         |         |
|--------|----|---|---|-------------------------|---------|
| US 37  | 80 | M | Y | Adenocarcinoma          | IA      |
| US 39  | 69 | M | Y | Adenocarcinoma          | IB      |
| US 40  | 48 | M | Y | Adenocarcinoma          | IIIA    |
| US 41  | 67 | M | Y | Adenocarcinoma          | IIIA    |
| US 42  | 55 | F | Y | Adenocarcinoma          | IA      |
| US 44  | 68 | M | Y | Adenocarcinoma          | IA      |
| US 45  | 44 | F | Y | Large cell carcinoma    | IV      |
| US 49  | 73 | F | Y | Large cell carcinoma    | IA      |
| US 50  | 71 | M | Y | Large cell carcinoma    | IA      |
| US 51  | 59 | M | Y | Large cell carcinoma    | IA      |
| US 53  | 46 | F | Y | Large cell carcinoma    | IB      |
| US 54  | 62 | M | Y | Large cell carcinoma    | IB      |
| US 55  | 72 | M | Y | Large cell carcinoma    | IB      |
| US 56  | 69 | M | Y | Large cell carcinoma    | IB      |
| US 60  | 70 | M | Y | Large cell carcinoma    | IIIA    |
| US 61  | 72 | M | Y | Large cell carcinoma    | IIIA    |
| US 63  | 55 | F | Y | Large cell carcinoma    | IB      |
| US 64  | 60 | M | Y | Large cell carcinoma    | IB      |
| US 65  | 77 | F | Y | Large cell carcinoma    | Unknown |
| US 66  | 64 | M |   | Large cell carcinoma    | Unknown |
| US 68  | 70 | M | Y | Squamous cell carcinoma | IV      |
| US 69  | 66 | F | Y | Squamous cell carcinoma | IA      |
| US 72  | 66 | F | Y | Squamous cell carcinoma | IA      |
| US 74  | 79 | M | Y | Squamous cell carcinoma | IA      |
| US 77  | 69 | M | Y | Squamous cell carcinoma | IA      |
| US 78  | 70 | M | Y | Squamous cell carcinoma | IA      |
| US 79  | 67 | M | Y | Squamous cell carcinoma | IA      |
| US 80  | 68 | M | Y | Squamous cell carcinoma | IA      |
| US 81  | 83 | F | Y | Squamous cell carcinoma | IB      |
| US 83  | 80 | F | Y | Squamous cell carcinoma | IB      |
| US 85  | 60 | M | Y | Squamous cell carcinoma | IB      |
| US 87  | 77 | M | Y | Squamous cell carcinoma | IB      |
| US 88  | 66 | M | Y | Squamous cell carcinoma | IB      |
| US 89  | 73 | M | Y | Squamous cell carcinoma | IB      |
| US 91  | 69 | F | Y | Squamous cell carcinoma | IIB     |
| US 92  | 75 | F | Y | Squamous cell carcinoma | IIB     |
| US 94  | 60 | F | Y | Squamous cell carcinoma | IIIA    |
| US 95  | 63 | F | Y | Squamous cell carcinoma | IIIA    |
| US 96  | 56 | M | Y | Squamous cell carcinoma | IIIA    |
| US 98  | 59 | M | Y | Squamous cell carcinoma | IIIA    |
| US 100 | 71 | M | Y | Squamous cell carcinoma | IIIA    |

|        |    |   |   |                         |                         |
|--------|----|---|---|-------------------------|-------------------------|
| US 101 | 61 | M | Y | Squamous cell carcinoma | IIIA                    |
| US 102 | 69 | F | N | Squamous cell carcinoma | Metastases from bladder |
| US 103 | 62 | F | Y | Squamous cell carcinoma | Metastases from cervix  |
| US 104 | 55 | M | Y | Small cell carcinoma    | Metastatic              |
| US 105 | 59 | M | Y | Small cell carcinoma    | Extensive               |
| US 106 | 69 | M | Y | Small cell carcinoma    | Limited                 |
| US 107 | 80 | M | Y | Small cell carcinoma    | Extensive               |
| US 108 | 65 | F | Y | Small cell carcinoma    | Extensive               |
| US 109 | 75 | M | Y | Small cell carcinoma    | Extensive               |
| US 110 | 67 | M |   | Large/Adeno             | IB                      |
| US 111 | 66 | M | Y | Small/Adeno             | IB                      |
| US 112 | 65 | M | Y | Small/Adeno/Large cell  | IIIB                    |

**Supplementary Table 1c. Patient Clinical History: African Americans**

| <b>Patient ID</b> | <b>Age</b> | <b>Sex</b> | <b>Smoker</b> | <b>Tumor Type</b>    | <b>Stage</b> |
|-------------------|------------|------------|---------------|----------------------|--------------|
| US 3              | 84         | F          | Y             | Adenocarcinoma       | IV           |
| US 7              | 60         | F          | Y             | Adenocarcinoma       | IA           |
| US 9              | 54         | F          | Y             | Adenocarcinoma       | IIB          |
| US 10             | 59         | F          | Y             | Adenocarcinoma       | IIIA         |
| US 11             | 40         | F          | Y             | Adenocarcinoma       | IIIA/IIIB    |
| US 12             | 69         | M          | Y             | Adenocarcinoma       | IB           |
| US 17             | 81         | F          | Y             | Adenocarcinoma       | IA           |
| US 19             | 71         | F          | Y             | Adenocarcinoma       | IB           |
| US 23             | 59         | M          | Y             | Adenocarcinoma       | IA           |
| US 29             | 80         | F          | N             | Adenocarcinoma       | IIIA         |
| US 32             | 59         | M          | Y             | Adenocarcinoma       | IIIA         |
| US 33             | 71         | M          | Y             | Adenocarcinoma       | IA           |
| US 34             |            | M          | Y             | Adenocarcinoma       | IB           |
| US 38             | 69         | F          | Y             | Adenocarcinoma       | IIIA         |
| US 43             | 73         | M          | Y             | Adenocarcinoma       | IIIA         |
| US 46             | 43         | F          | Y             | Large cell carcinoma | IV           |
| US 47             | 47         | F          | Y             | Large cell carcinoma | IV           |
| US 48             | 51         | F          | Y             | Large cell carcinoma | IV           |
| US 52             | 70         | F          | N             | Large cell carcinoma | IB           |
| US 57             | 77         | F          | N             | Large cell carcinoma | IIA          |
| US 58             | 75         | M          | Y             | Large cell carcinoma | IIA          |
| US 59             | 63         | M          | Y             | Large cell carcinoma | IIB          |
| US 62             | 46         | F          | Y             | Large cell carcinoma | IIIB         |
| US 67             | 60         | M          | Y             | Large cell carcinoma |              |

|        |    |   |   |                         |      |
|--------|----|---|---|-------------------------|------|
| US 70  | 76 | F | Y | Squamous cell carcinoma | IA   |
| US 71  | 72 | F | Y | Squamous cell carcinoma | IA   |
| US 73  | 83 | M | Y | Squamous cell carcinoma | IA   |
| US 75  | 63 | M | Y | Squamous cell carcinoma | IA   |
| US 76  | 69 | M | Y | Squamous cell carcinoma | IA   |
| US 82  | 53 | F | Y | Squamous cell carcinoma | IB   |
| US 84  | 72 | M | Y | Squamous cell carcinoma | IB   |
| US 86  | 82 | M | Y | Squamous cell carcinoma | IB   |
| US 90  | 60 | F | Y | Squamous cell carcinoma | IIA  |
| US 93  | 61 | M | Y | Squamous cell carcinoma | IIB  |
| US 97  | 69 | M | Y | Squamous cell carcinoma | IIIA |
| US 99  | 68 | M | Y | Squamous cell carcinoma | IIIA |
| US 113 | 72 | M | Y | Large/Adeno             | IB   |
| US 114 | 72 | M | Y | Adeno/Squamous          | IIB  |
| US 115 | 52 | M | Y | Adeno/Squamous          | IIIA |
| US 116 | 59 | M | Y | Adenocarcinoma          |      |
| US 117 | 73 | F | Y | Adenocarcinoma          |      |
| US 118 | 70 | F | Y | Adenocarcinoma          |      |
| US 119 | 78 | F | N | Adenocarcinoma          |      |
| US 120 | 70 | F | Y | Carcinoid tumor         |      |
| US 121 | 65 | F | Y | Squamous cell carcinoma |      |
| US 122 | 59 | F | Y | Adenocarcinoma          |      |
| US 123 | 63 | M | Y | Adenocarcinoma          |      |
| US 124 | 65 | M | Y | Squamous cell carcinoma |      |
| US 125 | 53 | F | Y | Adenocarcinoma          |      |
| US 126 | 74 | F | N | Carcinoid tumor         |      |
| US 127 | 61 | M | Y | Squamous cell carcinoma |      |
| US 128 | 67 | M | Y | Squamous cell carcinoma |      |
| US 129 | 58 | M | Y | Squamous cell carcinoma |      |
| US 130 | 79 | M | N | Adenocarcinoma          |      |
| US 131 | 63 | F | Y | Adenocarcinoma          |      |
| US 132 | 73 | F | Y | Adenocarcinoma          |      |
| US 133 | 64 | F | Y | Squamous cell carcinoma |      |
| US 134 | 64 | M | Y | Squamous cell carcinoma |      |
| US 135 | 66 | M | Y | Squamous cell carcinoma |      |
| US 136 | 78 | F | Y | Squamous cell carcinoma |      |
| US 137 | 75 | F | Y | Squamous cell carcinoma |      |
| US 138 | 64 | F | Y | Squamous cell carcinoma |      |
| US 139 | 65 | F | Y | Squamous cell carcinoma |      |
| US 140 | 49 | M | Y | Squamous cell carcinoma |      |
| US 141 | 64 | M | N | Squamous cell carcinoma |      |



|        |    |   |   |                         |
|--------|----|---|---|-------------------------|
| US 142 | 66 | M | N | Squamous cell carcinoma |
|--------|----|---|---|-------------------------|

Open boxes: information not available

**Supplementary Table 2.** Multiplex PCR-amplification primers

| <b>Gene</b> | <b>Exon #</b> | <b>Forward (5' to 3')</b>        | <b>Reverse (5' to 3')</b>             |                               |
|-------------|---------------|----------------------------------|---------------------------------------|-------------------------------|
| <b>MET</b>  | 2             | GACAAC TGAAC TGC TCTCGCCTTGAACC  | GAGAATATGCAGTGAACCTCCGACTGTATG        |                               |
|             | 2             | GACTGGG CCTGTGCTGGAACACC         | GATGAAAGGACTTTGGCTCCCAGGGC            |                               |
|             | 2             | GCCCTGGGAGCCAAAGTCCTTTTCATC      | CACTCCAGAGGCATTTCCATGTAGGAATGC        |                               |
|             | 2             | CATGTC TTTCCCCACAATCATACTGCTGA   | CTTTTCTGTGAGAATACTCCAGAGGC            |                               |
|             | 2             | CAGGTTCTGTTCCATAAACTCTGGATTGC    | CCTATTAAGCAGTGCTCATGATTGGGTCCG        |                               |
|             | 3             | TGATTATCCTTGCCATTATCCTCCAGGCTCTG | ACCAGATAGAACAGACACAGCTACTCTCAG        |                               |
|             | 4             | GGTCTTCAGTTCAAACACCCACAAGC       | GCCAAGTGACACTGGTTGTAAATATGC           |                               |
|             | 14            | GGGCCCATGATAGCCGTCTTTAACAAGC     | TGTGTCAAATACTTACTTGGCAGAGGTAAATACTTCC |                               |
|             | 15            | GCTCTTCCTGTTTCAGTCCCCATTAATGAGG  | CACCATTGTCTAAGTTCCTAATCTGCAAAGGCC     |                               |
|             | 16            | CCCCCTACTAATGAGGGCTCTGAGGG       | GTTACGCAGTGCTAACCAAGTTCCTTC           |                               |
|             | 17            | CCCTCAGGACAAGATGCTAACTGTGTGG     | GGGATGGCTGGCTTACAGCTAGTTTGC           |                               |
|             | 18            | ACTCCTGGCCTCAAGCCATCCTCTC        | GGATTGTGGCACAGAGATTCTGATACTTAC        |                               |
|             | 19            | CTCAGCCTGTTGAATTGGCAATGTCAATGTC  | CAGAGATAACCAATACATTACCACATCTGACTTGG   |                               |
|             | 20            | GAGACCCTTTGAAGGCAGGCATTTTC       | GCCAAGTTTAGTTACCAAGACCTACTGATTTTC     |                               |
|             | <b>EGFR</b>   | 18                               | TGCTTTCCAGCATGGTGAGGGCTG              | ATATACAGCTTGCAAGGACTCTGGGCTCC |
|             |               | 19                               | CAGCATGTGGCACCATCTCACAATTGC           | GCAGCTGCTCTGCTCTAGACCCTG      |
| 20          |               | ACCATGCGAAGCCACACTGACGTG         | AGACCGCATGTGAGGATCCTGGCTC             |                               |
| 21          |               | CTTCCCATGATGATCTGTCCCTCACAGC     | GGAGAGCATCCTCCCCTGCATGTGT             |                               |

|              |      |                                |                                 |
|--------------|------|--------------------------------|---------------------------------|
| <b>KRAS2</b> | 1    | GGTACTGGTGGAGTATTTGATAGTG      | GAATGGTCCTGCACCAGTAATATG        |
| <b>TP53</b>  | 1, 2 | TGACCCAGGGTTGGAAGTGTCTCATG     | CCCAGCCCAACCCTTGTCCTTAC         |
|              | 3    | AGGGTGAAGAGGAATCCCAAAGTTCCAAAC | GGTCCTCTGACTGCTCTTTTCACCCATC    |
|              | 4, 5 | GGGAGGTCAAATAAGCAGCAGGAGAAAGC  | GTGCCCTGACTTTCAACTCTGTCTCCTTC   |
|              | 6    | TGGAGCTTGCAGTGAGCTGAGATCAC     | GGATGTGATGAGAGGTGGATGGGTAGTAG   |
|              | 7, 8 | GACAAGGGTGGTTGGGAGTAGATGGAG    | GGAAACTTTCCACTTGATAAGAGGTCCCAAG |
|              | 9    | GTCAGCTGTATAGGTAAGTGCAG        | AGCTGCCTTTGACCATGAAGGCAG        |
|              | 10   | TGGGCAACAAGAGTGAAACTCCGTC      | GACCCAAAACCCAAAATGGCAGGG        |

---

**Supplementary Table 3.** MET mutations with known SNP IDs

| <b>MET Mutation</b> | <b>SNP ID</b> | <b>SNP type</b> |
|---------------------|---------------|-----------------|
| S178S               | rs35775721    | Synonymous      |
| N375S               | rs33917957    | Non-synonymous  |
| I377I               | rs28444388    | Synonymous      |
| R988C               | rs34589476    | Non-synonymous  |
| D1304D              | rs41736       | Synonymous      |

**Supplementary Table 4.** Computational analysis of MET sema domain non-synonymous mutations

| Mutations |   | Amino acid property  | Potential H-bond (n) | $\omega$ value /z score <sup>a</sup> | Probability to be binding Residue <sup>b</sup> | $\Delta$ Potential energy (DOPE) <sup>c</sup> | RMSD (Å) <sup>d</sup> |
|-----------|---|----------------------|----------------------|--------------------------------------|------------------------------------------------|-----------------------------------------------|-----------------------|
| 168       | E | Polar/negative       | 2                    | 0.132/0.07                           | 0.71                                           | -0.002                                        | 0.15                  |
|           | D | Polar/negative       | 1                    |                                      |                                                |                                               |                       |
| 229       | L | Hydrophobic          | 0                    | 0.113/0.18                           | 0.59                                           | 0.003                                         | 0.70                  |
|           | F | Hydrophobic/aromatic | 0                    |                                      |                                                |                                               |                       |
| 323       | S | Polar                | 3                    | 0.125/0.11                           | 0.21                                           | 0                                             | 0.71                  |
|           | G | Hydrophobic          | 2                    |                                      |                                                |                                               |                       |
| 347       | A | Hydrophobic          | 0                    | 0.040/0.59                           | 0.0                                            | 0.003                                         | 0.70                  |
|           | T | Hydrophobic/polar    | 0                    |                                      |                                                |                                               |                       |
| 355       | E | Polar/negative       | 2                    | 0.078/0.37                           | 0.08                                           | 0.002                                         | 0.68                  |
|           | K | Polar/positive       | 2                    |                                      |                                                |                                               |                       |
| 362       | M | Hydrophobic          | 0                    | 0.078/0.37                           | 0.94                                           | 0.004                                         | 0.70                  |
|           | T | Hydrophobic/polar    | 0                    |                                      |                                                |                                               |                       |
| 375       | N | Polar                | 2                    | 0.039/0.60                           | 0.62                                           | 0                                             | 0.25                  |
|           | S | Polar                | 1                    |                                      |                                                |                                               |                       |
| 431       | M | Hydrophobic          | 0                    | 0.072/0.41                           | 0.82                                           | 0                                             | 0.60                  |
|           | V | Hydrophobic          | 0                    |                                      |                                                |                                               |                       |
| 454       | N | Polar                | 3                    | 0.107/0.21                           | 0.37                                           | -0.006                                        | 0.60                  |
|           | I | Hydrophobic          | 2                    |                                      |                                                |                                               |                       |

Using 1SHY chain B as template, mutations are modeled by MODELLER and SWISS-model.

<sup>a</sup> The nonsynonymous/synonymous rate ratio ( $\omega = d_N/d_S$ ) was calculated by PAML package, an implementation of the maximum likelihood method for estimating  $\omega$  values. Homologous sequences were collected from HSSP database and PSI-Blast searching. We repeatedly estimated  $\omega$  (20 times) using different initial  $\nu$  value that is assigned to all amino acid sites. The initial  $\omega$  values range from 0.01 to 2.00, at an interval of 0.1.

<sup>b</sup> We used Promate, an interface prediction program which combined many significant interface properties, to predict potential protein binding sites.

<sup>c</sup> Discrete Optimized Protein Energy (DOPE) was used to evaluate the accuracy of models. DOPE is a distance-dependent statistical potential based on a physical reference state that accounts for the finite size and spherical shape of proteins.

<sup>d</sup> Root Mean Square Deviation (RMSD) values were calculated from C $\alpha$  carbon of 1SHY B chain and mutation models.
